# Supplementary material for: Vitamin D Treatment Sequence Is Critical for Transcriptome Modulation of Immune Challenged Primary Human Cells
Source: Front Immunol. 2021 Dec 10;12:754056. doi: 10.3389/fimmu.2021.754056 (PMC8702862; doi:10.3389/fimmu.2021.754056)
Supplement: Supplementary file 2 [file Table_1.xlsx]

## Sheet: Sheet1
Sample	unmapped	multimapping	noFeature	ambiguous	unique
M1BE1	1180893 (2.86%)	31191218 (75.5%)	4527811 (10.96%)	145575 (0.35%)	4269065 (10.33%)
M1BE2	2317064 (3.04%)	59866835 (78.66%)	7084110 (9.31%)	232278 (0.31%)	6611154 (8.69%)
M1BE3	1386609 (2.43%)	44331188 (77.69%)	5872690 (10.29%)	187287 (0.33%)	5282344 (9.26%)
M1BV1	838507 (2.63%)	23366985 (73.17%)	4093007 (12.82%)	122488 (0.38%)	3513143 (11.00%)
M1BV2	787102 (2.25%)	22795111 (65.06%)	6037050 (17.23%)	174559 (0.50%)	5244357 (14.97%)
M1BV3	871830 (2.43%)	24949379 (69.63%)	5422962 (15.13%)	149628 (0.42%)	4439893 (12.39%)
M1DE1	1156652 (2.63%)	35315054 (80.41%)	3876583 (8.83%)	115510 (0.26%)	3453512 (7.86%)
M1DE2	1177595 (5.26%)	18002616 (80.37%)	1879217 (8.39%)	47830 (0.21%)	1292347 (5.77%)
M1DE3	1033780 (5.83%)	2005979 (11.31%)	8908286 (50.21%)	197573 (1.11%)	5595562 (31.54%)
M1DV1	1100492 (6.09%)	4763439 (26.34%)	6506588 (35.98%)	225508 (1.25%)	5486787 (30.34%)
M1DV2	565001 (2.29%)	16192780 (65.50%)	4596913 (18.59%)	103865 (0.42%)	3263972 (13.20%)
M1DV3	849655 (2.33%)	27360368 (74.98%)	4278404 (11.72%)	133185 (0.36%)	3868900 (10.6%)
M1LE1	611691 (3.96%)	3238348 (20.94%)	6707368 (43.37%)	166830 (1.08%)	4740272 (30.65%)
M1LE2	765101 (2.58%)	21659678 (73.15%)	3728537 (12.59%)	108009 (0.36%)	3346858 (11.30%)
M1LE3	1722276 (10.34%)	5909073 (35.48%)	5215798 (31.32%)	129877 (0.78%)	3676752 (22.08%)
M1LV1	477170 (2.36%)	8126242 (40.15%)	6530678 (32.27%)	171779 (0.85%)	4931791 (24.37%)
M1LV2	680173 (4.07%)	2730557 (16.32%)	8021494 (47.95%)	180084 (1.08%)	5116974 (30.59%)
M1LV3	808089 (4.47%)	5666131 (31.33%)	6733735 (37.23%)	151433 (0.84%)	4725800 (26.13%)
M2EB1	1403286 (5.57%)	3695862 (14.68%)	11793398 (46.85%)	277038 (1.10%)	8004213 (31.80%)
M2EB2	1405366 (4.64%)	3455056 (11.42%)	15296303 (50.55%)	329633 (1.09%)	9774613 (32.30%)
M2EB3	2002459 (6.45%)	3734575 (12.03%)	15434695 (49.73%)	320958 (1.03%)	9545237 (30.75%)
M2ED1	822099 (2.71%)	7618283 (25.12%)	13652260 (45.01%)	258883 (0.85%)	7980823 (26.31%)
M2ED2	602381 (2.41%)	2013010 (8.05%)	14191549 (56.72%)	262625 (1.05%)	7950652 (31.78%)
M2ED3	1627121 (6.22%)	5033560 (19.23%)	12167703 (46.49%)	232699 (0.89%)	7108988 (27.16%)
M2EL1	847945 (2.96%)	5556998 (19.42%)	13197457 (46.12%)	303747 (1.06%)	8708774 (30.43%)
M2EL2	1395586 (4.65%)	2372479 (7.90%)	15980105 (53.21%)	340791 (1.13%)	9944599 (33.11%)
M2EL3	4543169 (12.06%)	2467435 (6.55%)	19243077 (51.06%)	365351 (0.97%)	11065395 (29.36%)
M2VB1	1589985 (5.99%)	2678618 (10.09%)	13697520 (51.62%)	284352 (1.07%)	8286397 (31.23%)
M2VB2	985639 (4.02%)	1552172 (6.33%)	13415683 (54.68%)	285532 (1.16%)	8293796 (33.81%)
M2VB3	555077 (2.22%)	2401214 (9.61%)	14319079 (57.29%)	244517 (0.98%)	7473764 (29.9%)
M2VD1	671307 (2.78%)	1666882 (6.89%)	13988813 (57.86%)	244481 (1.01%)	7606095 (31.46%)
M2VD2	2509949 (9.21%)	2458793 (9.03%)	14180159 (52.05%)	250101 (0.92%)	7844915 (28.80%)
M2VD3	937412 (3.37%)	1790866 (6.45%)	15811273 (56.92%)	291165 (1.05%)	8946488 (32.21%)
M2VL1	833080 (2.71%)	1882100 (6.12%)	17787665 (57.80%)	348388 (1.13%)	9924026 (32.25%)
M2VL2	991846 (3.17%)	6921334 (22.15%)	14115118 (45.17%)	314705 (1.01%)	8905295 (28.50%)
M2VL3	1322347 (3.8%)	2556688 (7.34%)	19029374 (54.63%)	416554 (1.20%)	11505544 (33.03%)
M3BE1	631227 (2.1%)	22466918 (74.80%)	3940796 (13.12%)	89657 (0.30%)	2908511 (9.68%)
M3BE2	650369 (3.08%)	5578735 (26.38%)	8756868 (41.41%)	201172 (0.95%)	5960279 (28.18%)
M3BE3	726247 (2.71%)	19420681 (72.53%)	3694028 (13.80%)	91779 (0.34%)	2842714 (10.62%)
M3BV1	1132318 (3.77%)	9669392 (32.23%)	11940984 (39.8%)	238818 (0.80%)	7021350 (23.40%)
M3BV2	1102750 (4.54%)	1869535 (7.69%)	13419913 (55.21%)	259396 (1.07%)	7657639 (31.50%)
M3BV3	2309374 (8.92%)	8241474 (31.85%)	9508650 (36.74%)	184698 (0.71%)	5634381 (21.77%)
M3DE1	1307883 (3.58%)	26422171 (72.24%)	5001017 (13.67%)	118469 (0.32%)	3724093 (10.18%)
M3DE2	1217281 (4.71%)	17905609 (69.32%)	3839274 (14.86%)	86934 (0.34%)	2782179 (10.77%)
M3DE3	1145338 (4.4%)	19175171 (73.64%)	3194407 (12.27%)	77949 (0.30%)	2444741 (9.39%)
M3DV1	678707 (3.17%)	13526866 (63.21%)	4461656 (20.85%)	81366 (0.38%)	2652455 (12.39%)
M3DV2	423553 (1.84%)	17679314 (76.98%)	2709828 (11.80%)	68128 (0.30%)	2085916 (9.08%)
M3DV3	938158 (4.76%)	1892860 (9.61%)	10217799 (51.89%)	214234 (1.09%)	6429055 (32.65%)
M3LE1	1052044 (2.56%)	31320634 (76.14%)	5010637 (12.18%)	115955 (0.28%)	3638172 (8.84%)
M3LE2	1355334 (6.7%)	2691748 (13.31%)	9934223 (49.13%)	204417 (1.01%)	6035044 (29.85%)
M3LE3	835533 (3.69%)	16043764 (70.81%)	3349627 (14.78%)	74705 (0.33%)	2352389 (10.38%)
M3LV1	1993558 (10.15%)	3780901 (19.25%)	8775665 (44.67%)	168349 (0.86%)	4926509 (25.08%)
M3LV2	1215470 (2.8%)	32857010 (75.70%)	5242513 (12.08%)	118405 (0.27%)	3972871 (9.15%)
M3LV3	947829 (3.2%)	20852390 (70.49%)	4453461 (15.05%)	94703 (0.32%)	3235598 (10.94%)
